# Supplementary material
Source: MDPI journal article supplement (https://www.mdpi.com/2218-2004/9/4/98)
Supplement: s1 [file s1]

# Evaluation of Recommended Cross Sections for the Simulation of Electron Tracks in Water

Adrián García-Abenza <sup>1</sup>, Ana I. Lozano <sup>1,2</sup>, Juan C. Oller <sup>3</sup>, Francisco Blanco <sup>4</sup>, Jimena D. Gorfinkiel <sup>5</sup>, Paulo Limão-Vieira <sup>2</sup> and Gustavo García <sup>1,6,\*</sup>

<sup>1</sup> Instituto de Física Fundamental, Consejo Superior de Investigaciones Científicas, 28006 Madrid, Spain; adrian.garcia.abenza@csic.es (A.G.-A.); ai.lozano@fct.unl.pt (A.I.L.)

<sup>2</sup> Atomic and Molecular Collisions Laboratory, CEFITEC, Department of Physics, Universidade NOVA de Lisboa, 2829-516 Caparica, Portugal; plimaovieira@fct.unl.pt

<sup>3</sup> Centro de Investigaciones Energéticas Medioambientales y Tecnológicas-CIEMAT, 28040 Madrid, Spain; jc.oller@ciemat.es

<sup>4</sup> Departamento de Estructura de la Materia, Física Térmica y Electrónica e IPARCOS, Universidad Complutense de Madrid, 28040 Madrid, Spain; pacobr@fis.ucm.es

<sup>5</sup> School of Physical Sciences, The Open University, Milton Keynes MK7 6AA, UK; jimena.gorfinkiel@open.ac.uk

<sup>6</sup> Centre for Medical Radiation Physics, University of Wollongong, Wollongong, NSW 2522, Australia

\* Correspondence: g.garcia@csic.es

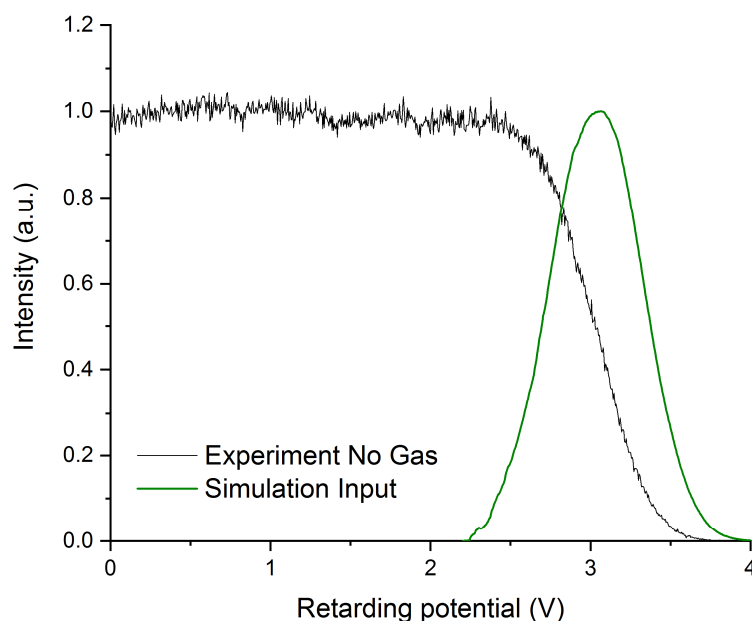

**Figure S1.** Transmitted electron intensity as a function of the RPA voltage for no gas inside the scattering chamber at an impact energy of 3 eV, together with derivative of the smoothed curve which is used as input for the simulation.

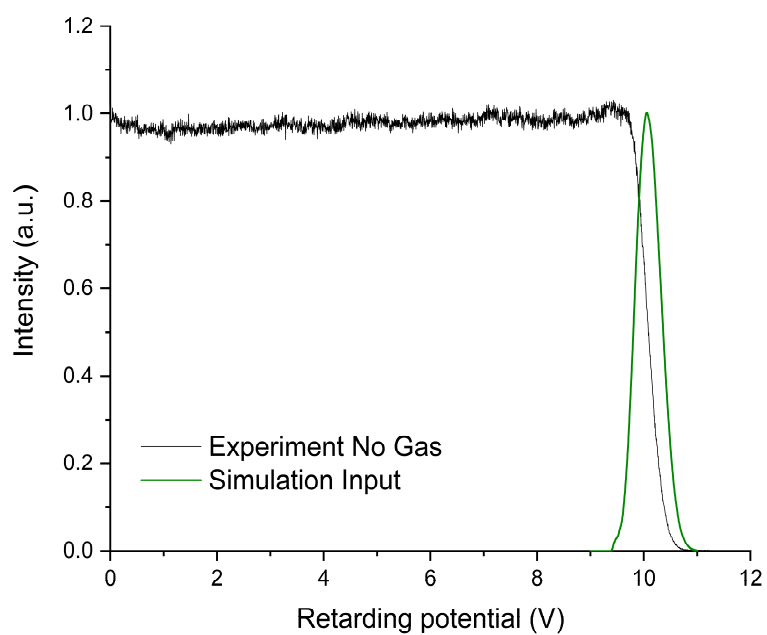

**Figure S2.** Transmitted electron intensity as a function of the RPA voltage for no gas inside the scattering chamber at an impact energy of 10 eV, together with derivative of the smoothed curve which is used as input for the simulation.

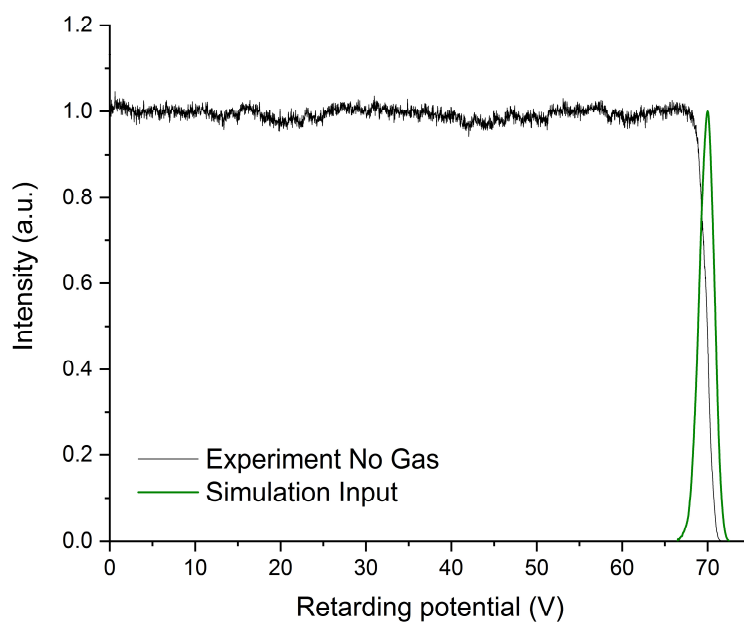

**Figure S3.** Transmitted electron intensity as a function of the RPA voltage for no gas inside the scattering chamber at an impact energy of 70 eV, together with derivative of the smoothed curve which is used as input for the simulation.
